# Supplementary material for: Chemotherapy‐Induced Senescence Reprogramming Promotes Nasopharyngeal Carcinoma Metastasis by circRNA‐Mediated PKR Activation
Source: PubMed Central journal article supplement (PMC10015868; doi:10.1002/advs.202205668), 2023-01-22
Supplement: ADVS-10-2205668-s001.pdf [file ADVS-10-2205668-s001.pdf]

## Supporting Information

for *Adv. Sci.*, DOI 10.1002/adv.202205668

Chemotherapy-Induced Senescence Reprogramming Promotes Nasopharyngeal Carcinoma Metastasis by circRNA-Mediated PKR Activation

*Qian Li, Yu-Heng Zhao, Cheng Xu, Ye-Lin Liang, Yin Zhao, Qing-Mei He, Jun-Yan Li, Kai-Lin Chen, Han Qiao, Na Liu, Jun Ma\*, Lei Chen\* and Ying-Qin Li\**

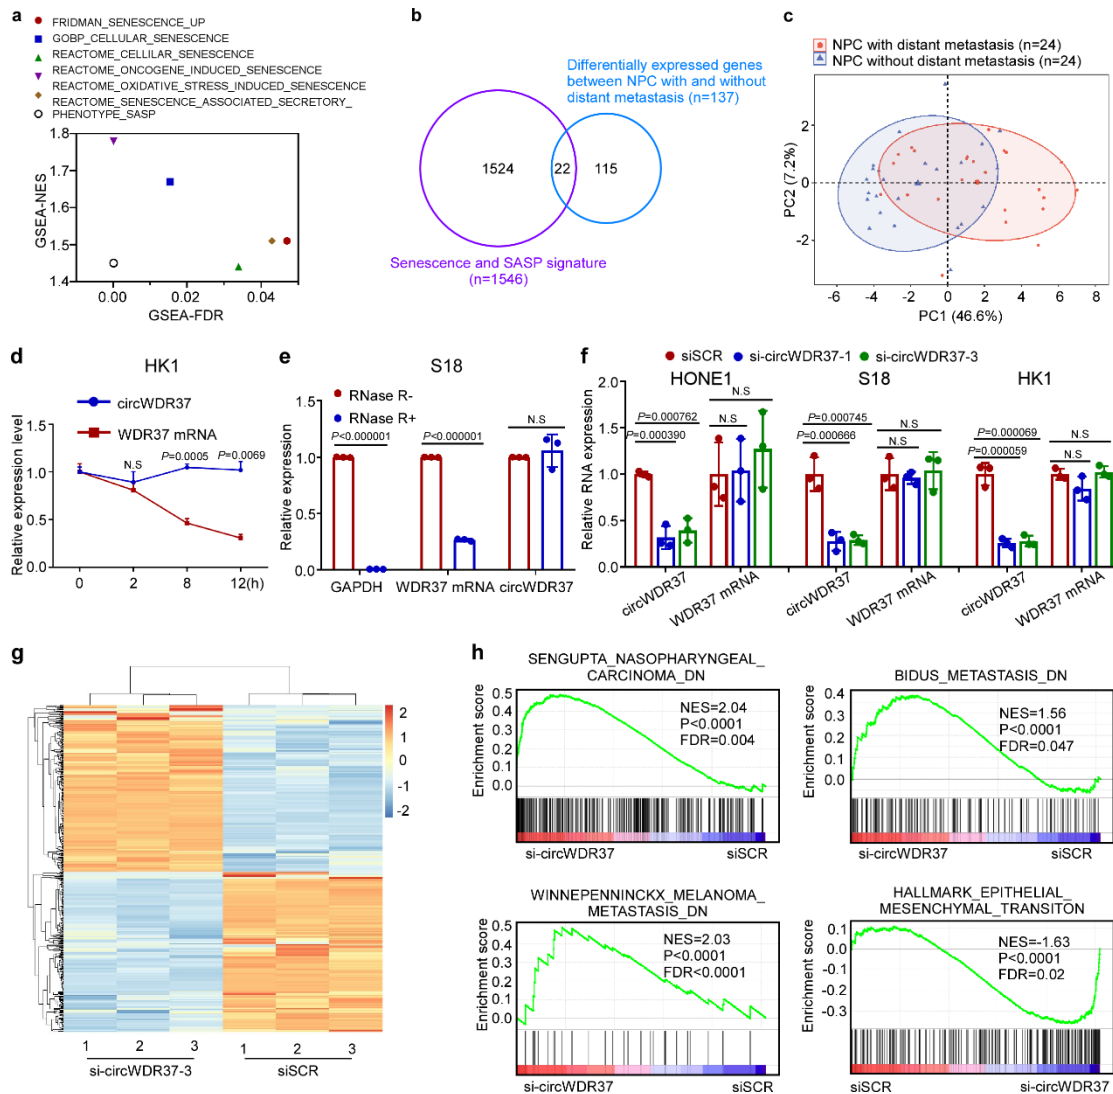

1

2 **Supplementary figure S1.** CircWDR37 is a key regulator in NPC senescence and  
 3 metastasis. a) GSEA analysis of the microarray sequencing results of 24 paired  
 4 locoregionally advanced NPC tissues with and without distant metastasis. NES,  
 5 normalized enrichment score; FDR, false discovery rate. b) Venn diagram showed that  
 6 22 of the 137 differentially expressed genes between metastasis and non-metastasis  
 7 NPC tissues were senescence-associated genes identified in the CellAge database. c)  
 8 Unsupervised PCA plot analysis of 22 senescence-associated genes via unfrac distance  
 9 in indicated samples. d) RT-qPCR assay for the expression of circWDR37 and WDR37  
 10 mRNA in HK1 cells treated with the transcription inhibitor Actinomycin D (2  $\mu$ g/ml)  
 11 at the indicated time points. e) RT-qPCR analysis of GAPDH, WDR37 mRNA and  
 12 circWDR37 expression after RNase R treatment in S18 cells. f) RT-qPCR results for

13 circular and linear transcripts of WDR37 in HONE1, S18 and HK1 cells treated with  
14 si-circWDR37 (oligonucleotides targeting the back-splice junction) or siSCR (control  
15 oligonucleotides with scramble sequence). g) Heat map of the differentially expressed  
16 mRNA between three pairs of circWDR37 depleted S18 cells and scramble control  
17 ( $|\text{Fold Change}| > 2$  and  $q \text{ value} < 0.05$ ). h) GSEA analysis of the RNA-seq results of si-  
18 circWDR37 and siSCR transfected S18 cells. NES, normalized enrichment score; FDR,  
19 false discovery rate. Mean ( $n = 3$ )  $\pm$  s.d. (Data were analyzed by d) two-way ANOVA  
20 with Bonferroni's post-hoc test, e) two-tailed Student's t-test) and f) one-way ANOVA  
21 with Dunnett's post-hoc test).  $P$  value  $< 0.05$  indicates statistical significance. N.S  
22 indicates no significant.

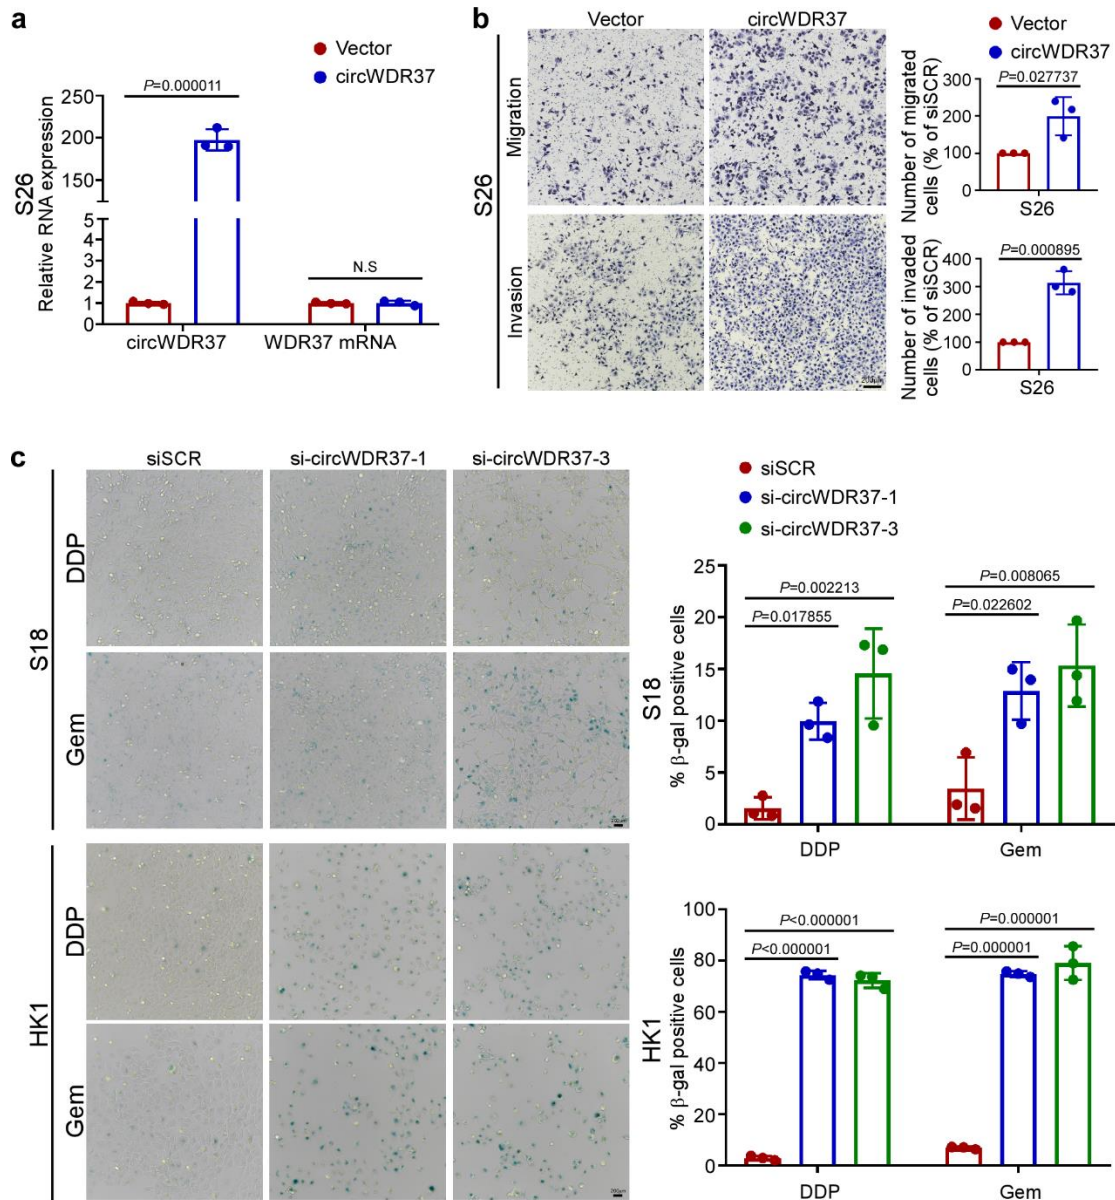

23

24 **Supplementary figure S2.** CircWDR37 deficiency limits chemotherapy-induced  
 25 senescent NPC cells from promoting metastasis *in vitro*. a) RT-qPCR results for circular  
 26 and linear transcripts of WDR37 in S26 cells transfected with circWDR37  
 27 overexpression plasmid or vector. b) Representative images and quantified results of  
 28 the transwell migration and invasion assays in S26 cells transfected with circWDR37  
 29 overexpression plasmid or vector. c) Representative images and quantified results of  
 30 SA- $\beta$ -gal staining si-circWDR37 or siSCR transfected S18 and HK1 cells with cisplatin  
 31 or gemcitabine treated for 24h. Mean ( $n = 3$ )  $\pm$  s.d. (Data were analyzed by a,b) two-  
 32 tailed Student's t-test and c) one-way ANOVA with Dunnett's post-hoc test).  $P$  value <  
 33 0.05 indicates statistical significance. N.S indicates no significant. Scale bar, 200  $\mu$ m.

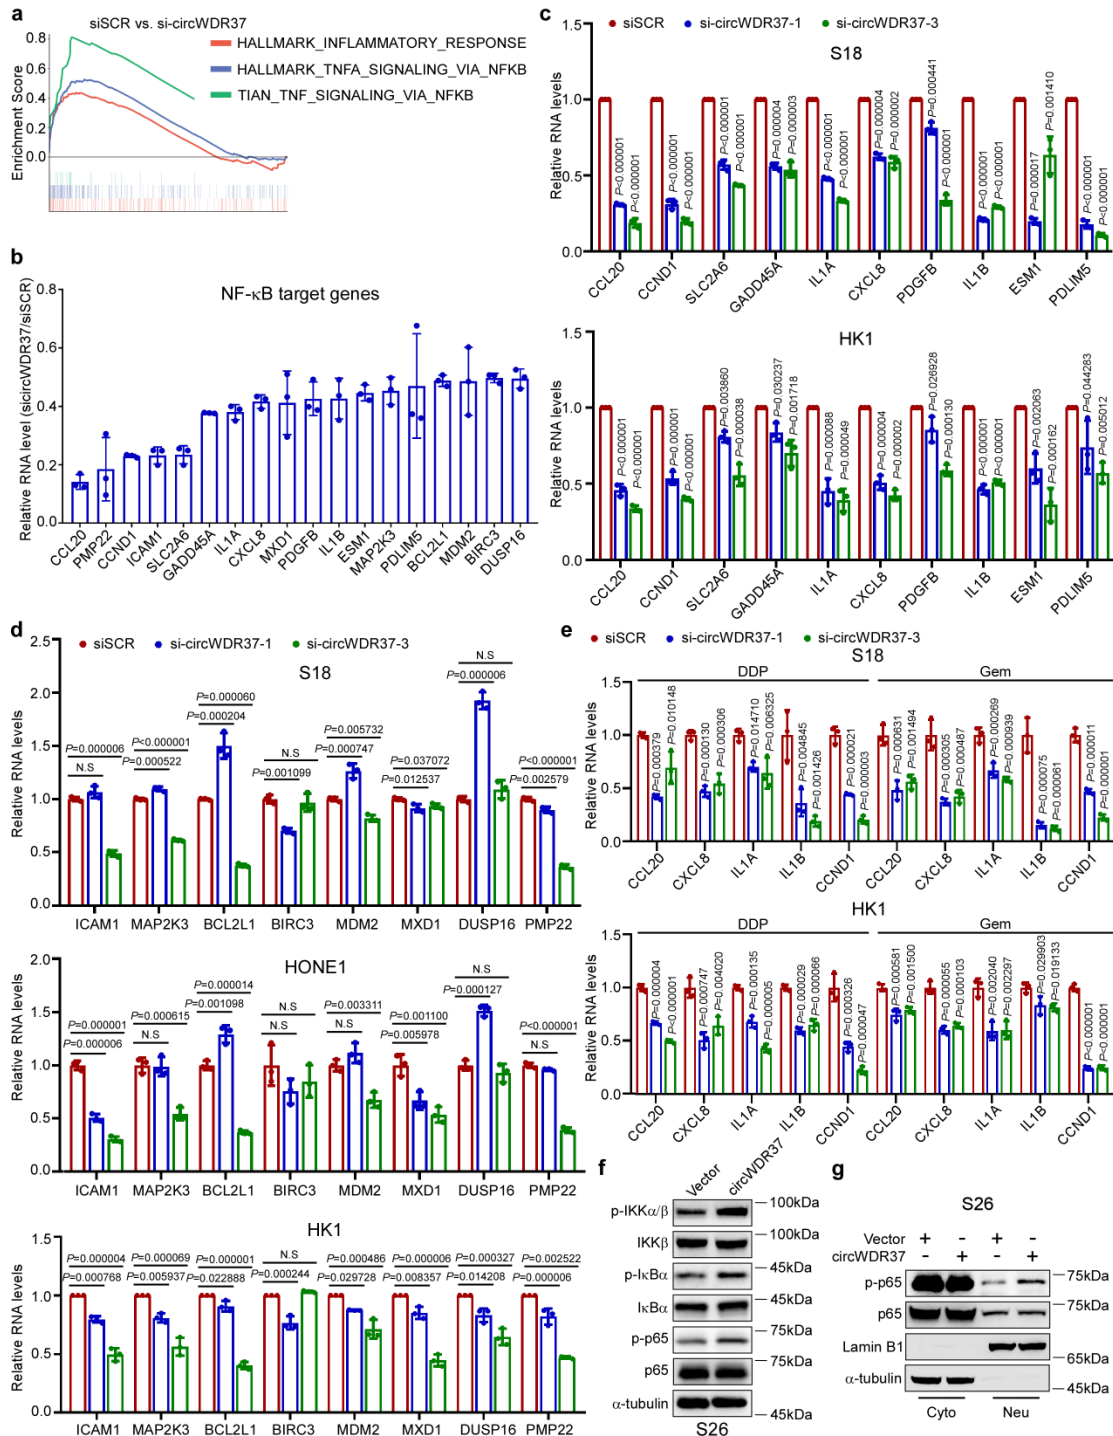

34

35 **Supplementary figure S3.** CircWDR37 stimulates NF-κB-mediated chemotherapy-  
 36 induced proinflammatory SASP gene transcription. a) GSEA analysis of the RNA-seq  
 37 results of si-circWDR37 and siSCR transfected S18 cells. b) RNA-seq results of mRNA  
 38 expression of the indicated NF-κB-targeted genes in circWDR37 knockdown S18 cells.  
 39 c) RT-qPCR results for the mRNA expression of the indicated NF-κB-targeted genes in  
 40 S18 and HK1 cells with circWDR37 knockdown. d) RT-qPCR results for the mRNA

41 expression of the indicated NF- $\kappa$ B-targeted genes, which had a different change in  
42 direction in HONE1, S18 and HK1 cells with circWDR37 knockdown. e) RT-qPCR  
43 results for the mRNA expression of the SASP component in si-circWDR37 or siSCR  
44 transfected S18 and HK1 cells with cisplatin or gemcitabine treated for 24h. f) Western  
45 blots analysis of indicated proteins in S26 cells transfected with circWDR37  
46 overexpression plasmid or control plasmid. g) Western blots analysis of the cytoplasmic  
47 (cyto) and nuclear (neu) fractions of S26 cells transfected with circWDR37  
48 overexpression plasmid or vector. Lamin B1 and  $\alpha$ -tubulin were used as nuclear and  
49 cytoplasmic markers, respectively. Mean ( $n = 3$ )  $\pm$  s.d. (c-e) Data were analyzed by one-  
50 way ANOVA with Dunnett's post-hoc test).  $P$  value  $<0.05$  indicates statistical  
51 significance. N.S indicates no significant.



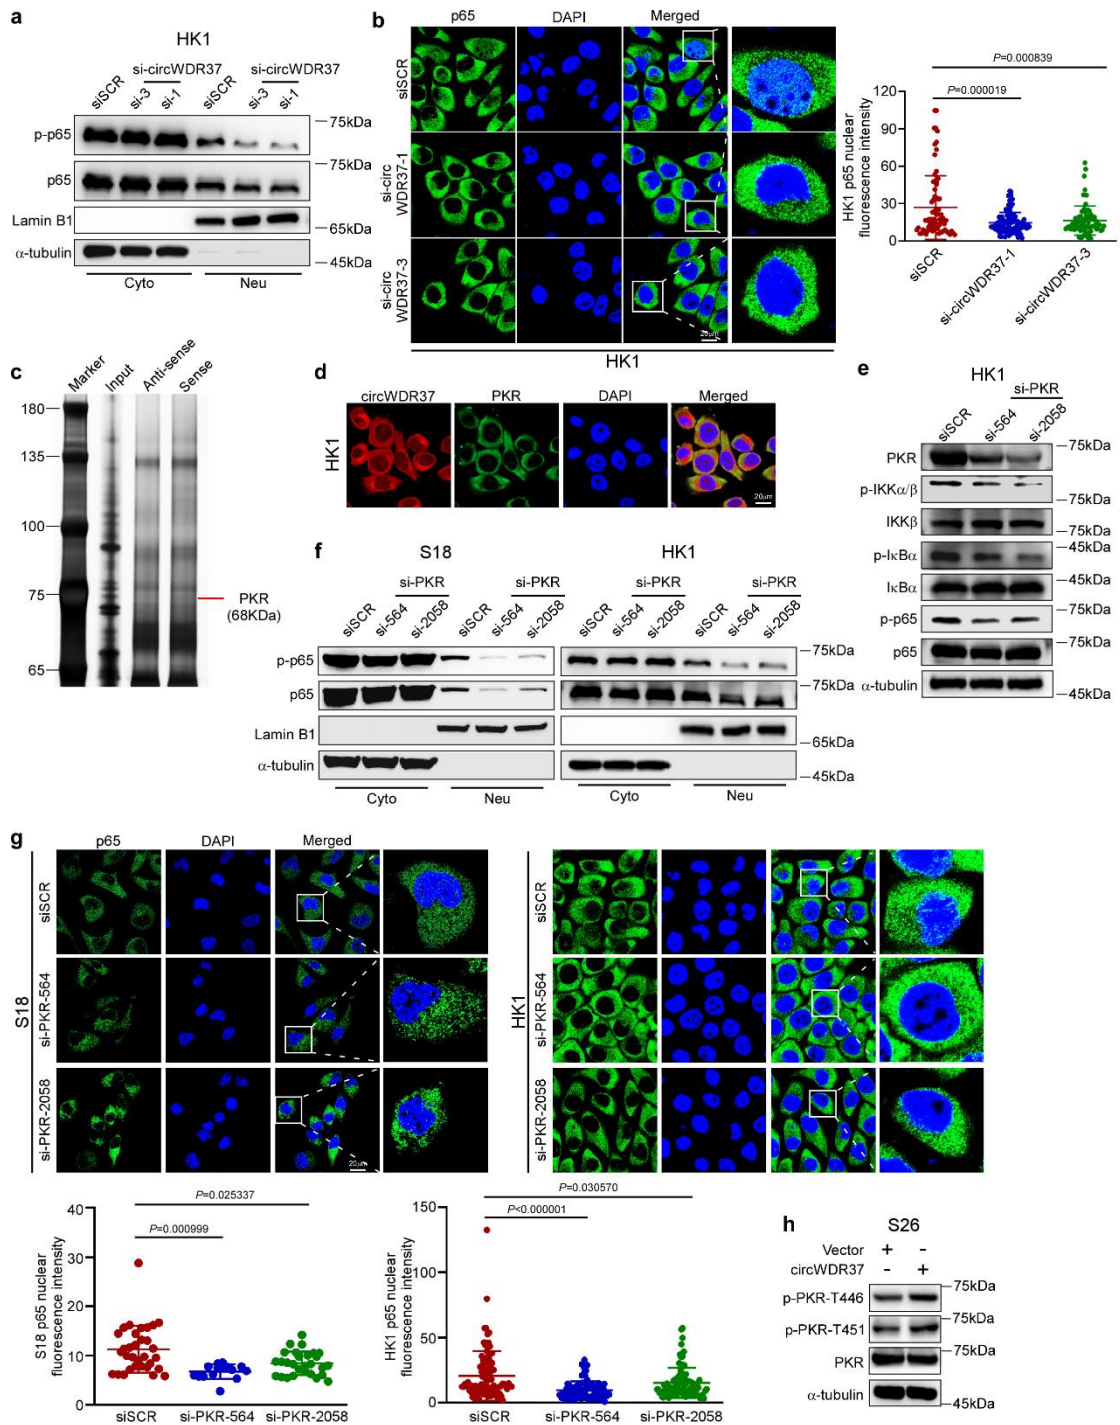

52

53 **Supplementary figure S4.** CircWDR37 induces PKR homodimerization and  
 54 phosphorylation. a) Western blots analysis of the indicated proteins in cytoplasmic (cyto)  
 55 and nuclear (neu) fractions of HK1 cells transfected with si-circWDR37 or siSCR.  
 56 Lamin B1 and  $\alpha$ -tubulin were used as nuclear and cytoplasmic markers, respectively. b)  
 57 Fluorescence microscopy analysis of HK1 cells transfected with si-circWDR37 or  
 58 siSCR, p65 nuclear fluorescence intensity was determined by ImageJ software. Nuclei  
 59 were stained with DAPI (blue). Scale bar, 20  $\mu$ m. c) Biotin-labeled in vitro transcribed

60 circWDR37 (sense) and corresponding complementary biotinylated RNA (antisense)  
61 were incubated with S18 total cell lysates for RNA pull down assays. The silver staining  
62 showed the sense-specific band at about 68kDa (red arrow). d) Co-localization of  
63 circWDR37 (red) with PKR proteins (green), respectively, in HK1 cells. Scale bar, 20  
64  $\mu\text{m}$ . e) Western blots analysis of the indicated proteins in HK1 cells treated with si-PKR  
65 or siSCR. f) Western blots analysis of the indicated proteins in cytoplasmic (cyto) and  
66 nuclear (neu) fractions of S18 and HK1 cells transfected with si-PKR or siSCR. Lamin  
67 B1 and  $\alpha$ -tubulin were used as nuclear and cytoplasmic markers, respectively. g)  
68 Fluorescence microscopy analysis of S18 and HK1 cells transfected with si-PKR or  
69 siSCR, p65 nuclear fluorescence intensity was determined by ImageJ software. Nuclei  
70 were stained with DAPI (blue). Scale bar, 20  $\mu\text{m}$ . h) Western blots analysis of total PKR  
71 and phosphorylated PKR (p-PKR-T446, p-PKR-T451) in S26 cells transfected with  
72 circWDR37 overexpression plasmid or vector. (b,g) Data were analyzed by one-way  
73 ANOVA with Scheffe's post-hoc test). *P* value <0.05 indicates statistical significance.



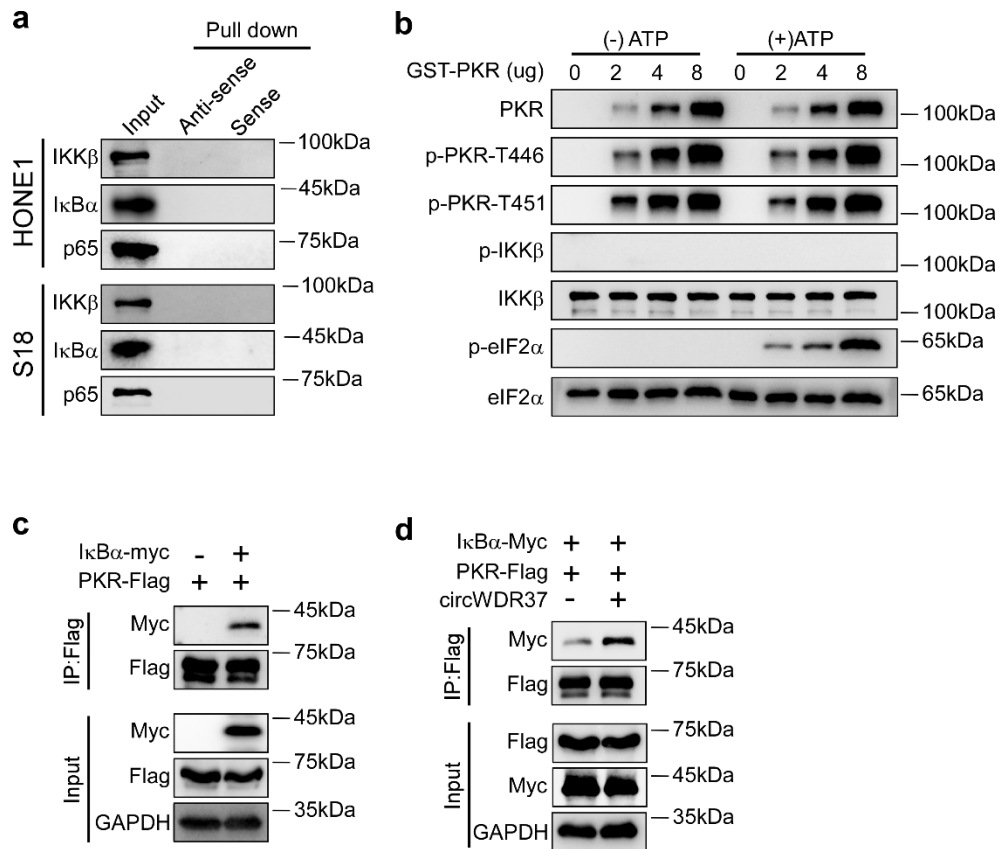

74

75 **Supplementary figure S5.** CircWDR37 promotes the binding of PKR to IKK $\beta$  and  
 76 facilitates the interaction of PKR with I $\kappa$ B $\alpha$  thus releasing p65 from inhibitory I $\kappa$ B $\alpha$ . a)  
 77 Biotin-labeled in vitro transcribed circWDR37 (sense) and corresponding  
 78 complementary biotinylated RNA (antisense) were incubated with HONE1 and S18  
 79 total cell lysates for RNA pull down assays, the precipitates and whole-cell lysates were  
 80 then analyzed by western blots with indicated antibodies. b) PKR kinase activity on  
 81 eIF2 $\alpha$  and IKK $\beta$  were determined with an in vitro kinase assay, GST-PKR, GST-eIF2 $\alpha$   
 82 and was GST-IKK $\beta$  were in vitro purified. c) Lysates from HEK293T cells co-  
 83 transfected with plasmids expressing PKR-Flag, along with I $\kappa$ B $\alpha$ -myc were  
 84 immunoprecipitated with an anti-Flag antibody, the precipitates and whole-cell lysates  
 85 were then analysed by western blots with indicated antibodies. d) Lysates from  
 86 HEK293T cells co-transfected with PKR-Flag and I $\kappa$ B $\alpha$ -myc along with circWDR37  
 87 or control plasmid were immunoprecipitated with anti-Flag antibody, the precipitates  
 88 and whole-cell lysates were then analysed by western blots with indicated antibodies.

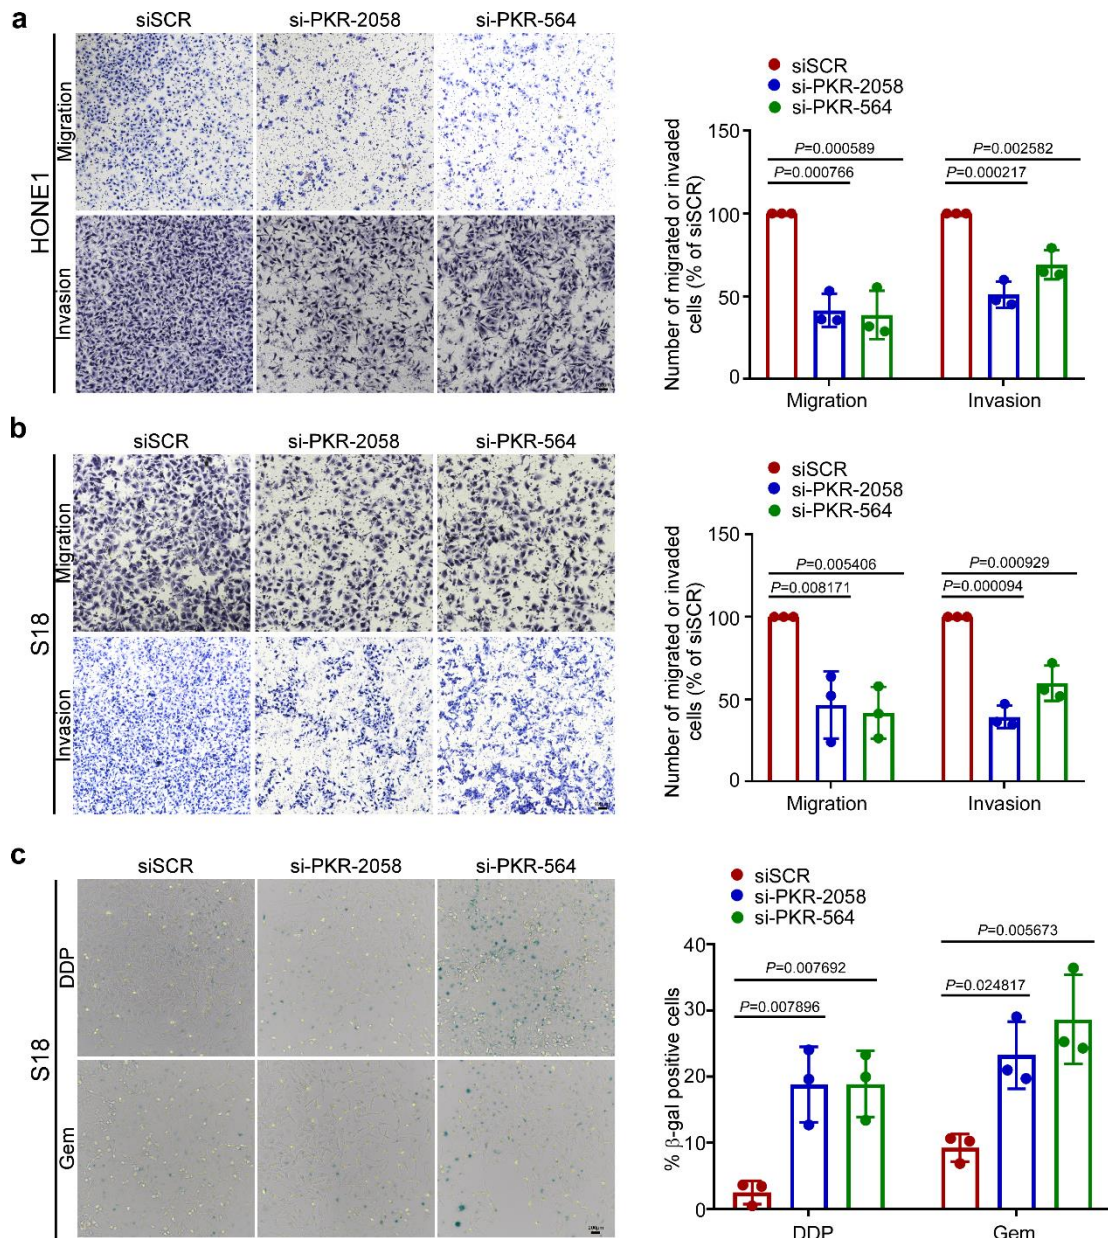

89

90 **Supplementary figure S6.** PKR is a functional mediator of circWDR37. a,b)  
 91 Representative images and quantified results of the transwell migration and invasion  
 92 assays in HONE1 (a) and S18 (b) cells transfected with si-PKR or siSCR. Scale bar,  
 93 100  $\mu\text{m}$ . c) Representative images and quantified results of SA- $\beta$ -gal staining si-PKR  
 94 or siSCR transfected S18 cells with cisplatin or gemcitabine treatment. Scale bar, 200  
 95  $\mu\text{m}$ . Mean ( $n = 3$ )  $\pm$  s.d. (a-c) Data were analyzed by one-way ANOVA with Dunnett's  
 96 post-hoc test).  $P$  value  $< 0.05$  indicates statistical significance. N.S indicates no  
 97 significant.

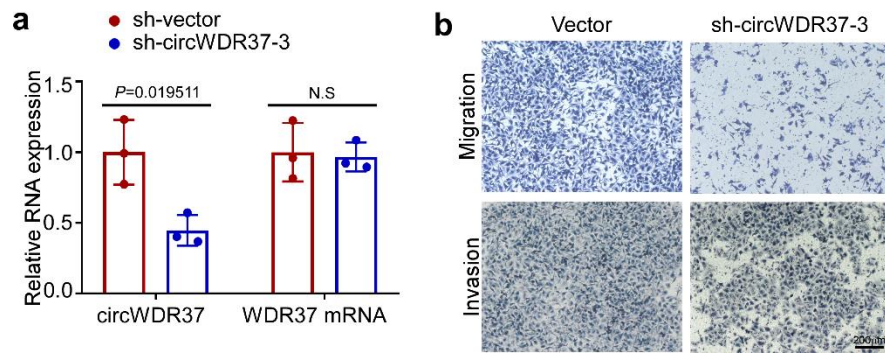

98

99 **Supplementary figure S7.** Migration and invasion abilities of S18 cells with  
 100 circWDR37 stable knockdown. a) RT-qPCR results for circular and linear transcripts  
 101 of WDR37 in S18 cells with sh-circWDR37 stable expression or its scramble control.  
 102 b) Representative images of the transwell migration and invasion assays in S18 cells  
 103 with sh-circWDR37 stable expression or its scramble control. Scale bar, 200 μm. (a)  
 104 Data were analyzed by two-tailed Student's t-test).  $P$  value  $<0.05$  indicates statistical  
 105 significance. N.S indicates no significant.

106

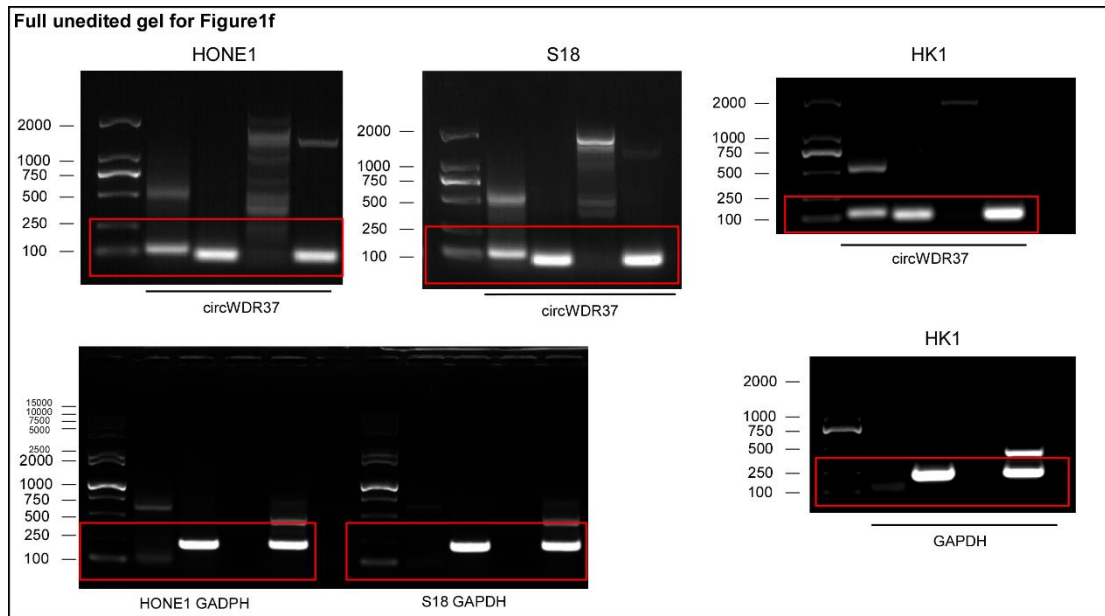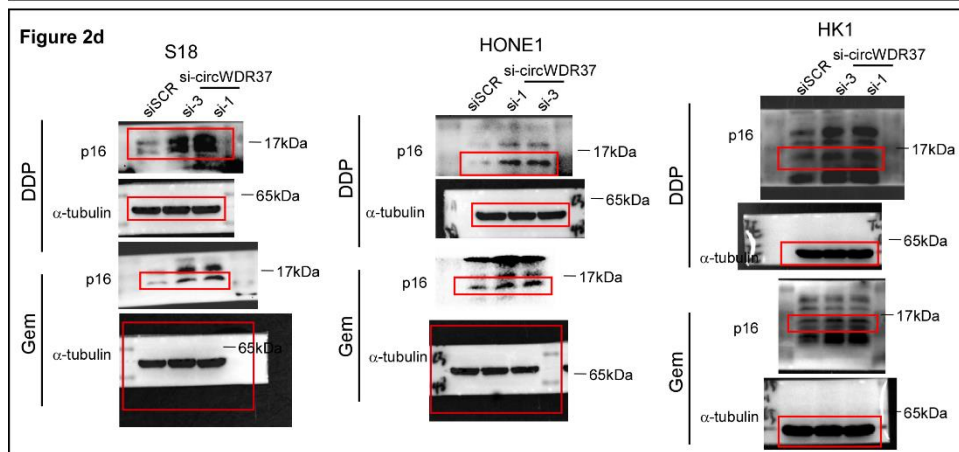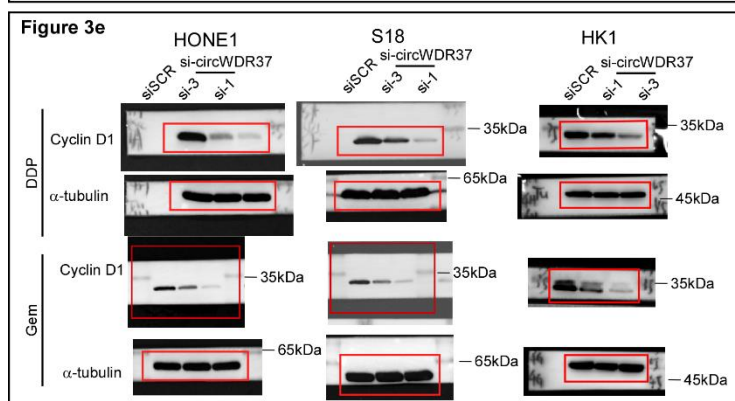



110 **Supplementary figure S8. Full unedited gels for all figures (continued).**

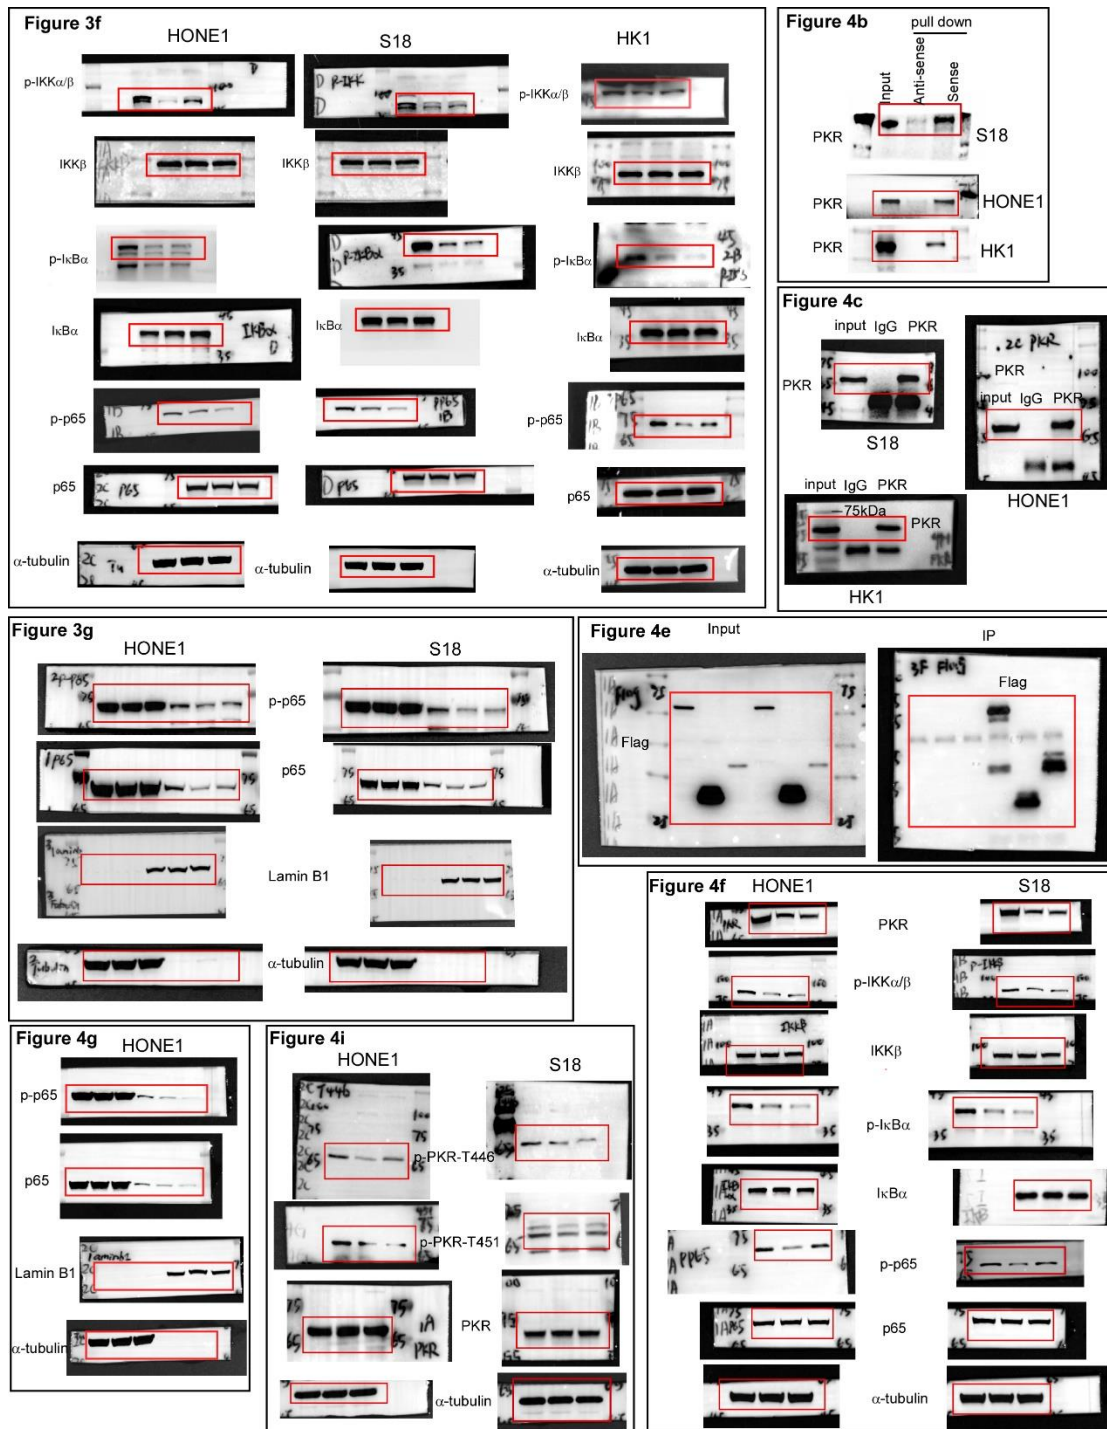

111

112

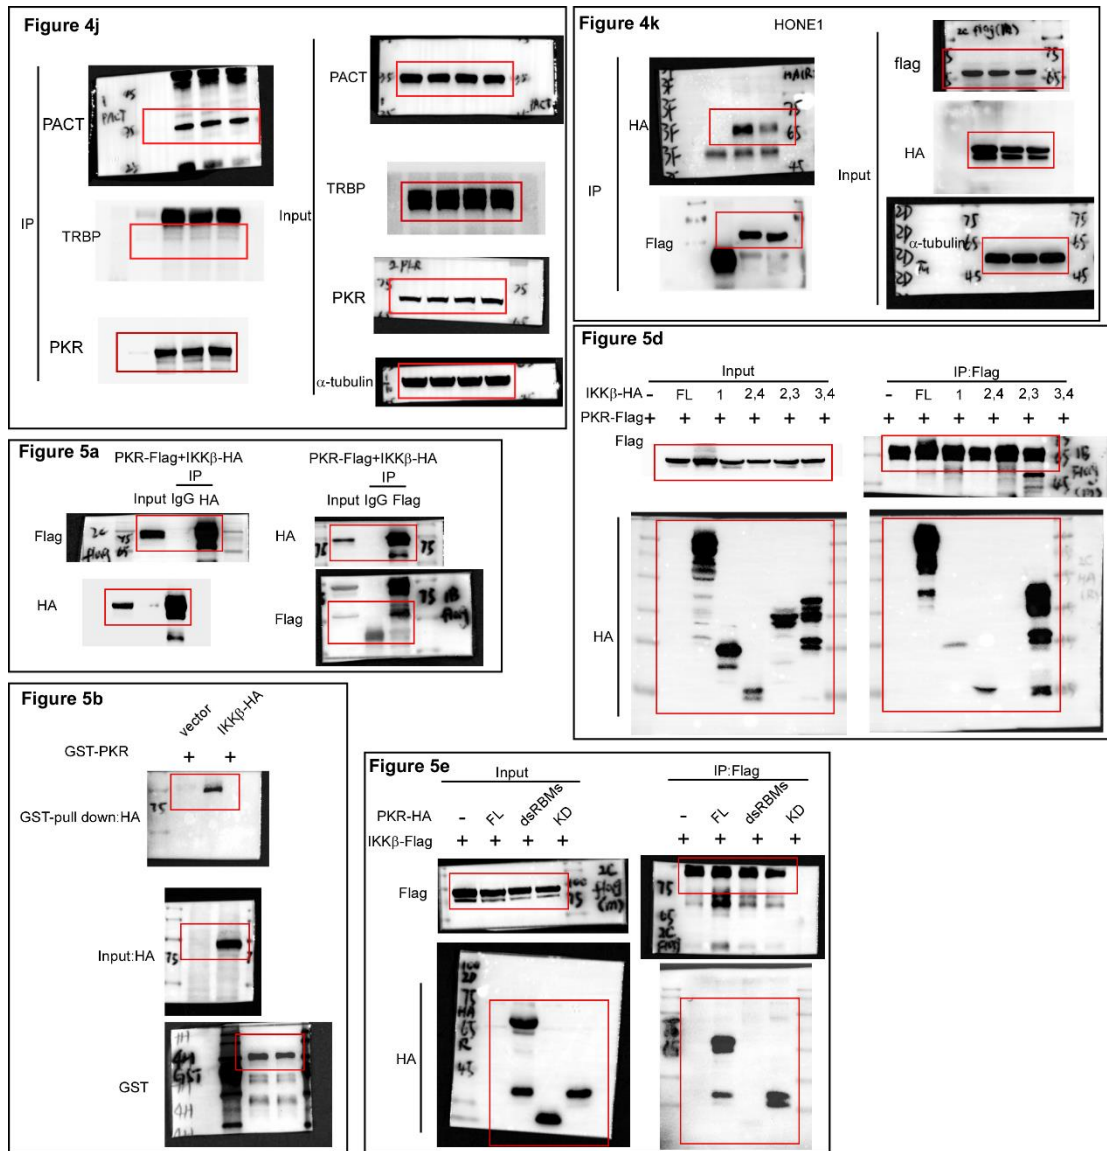

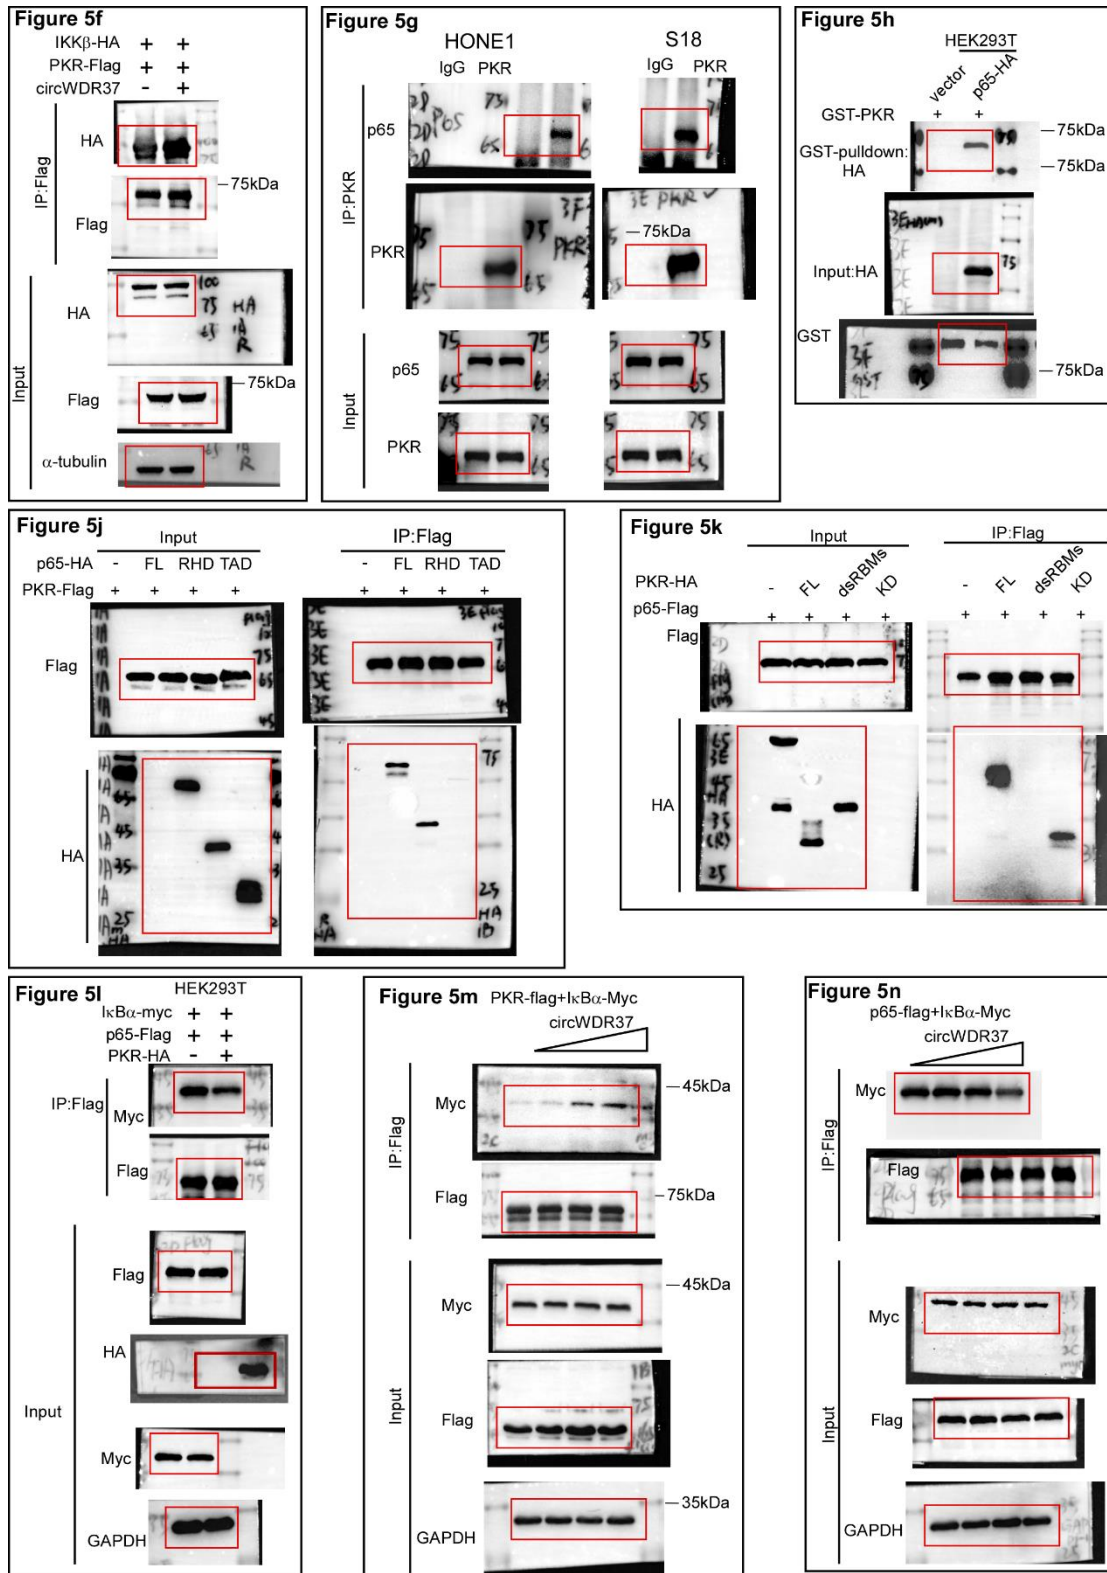



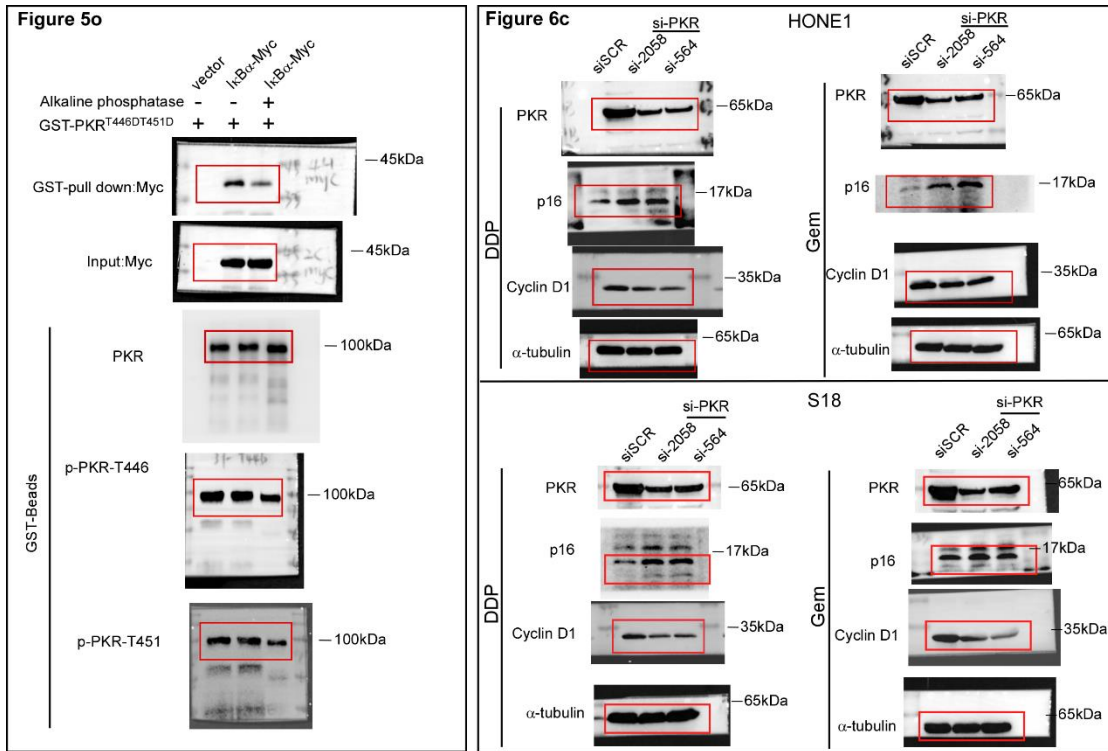

119

120

Supplementary figure S8. Full unedited gels for all figures (continued).

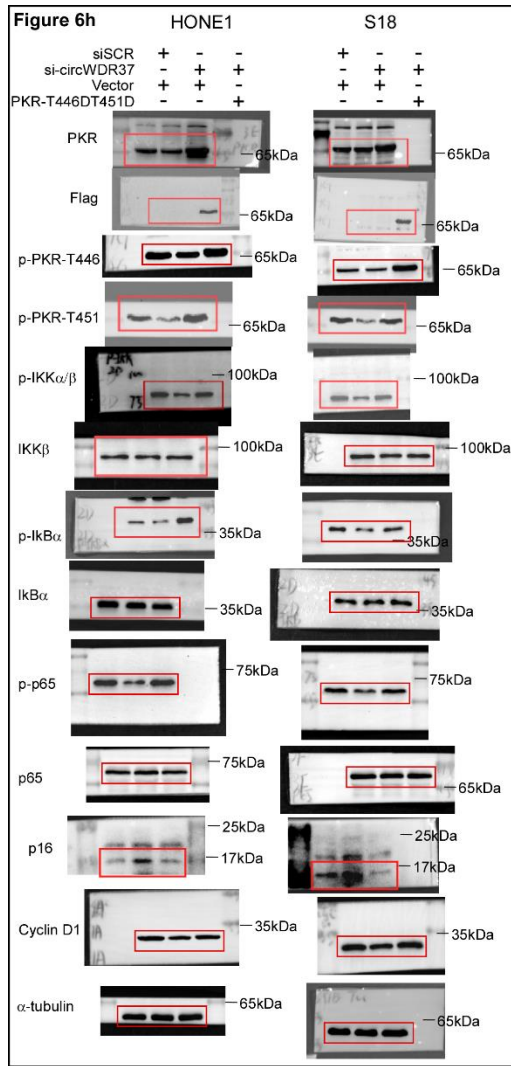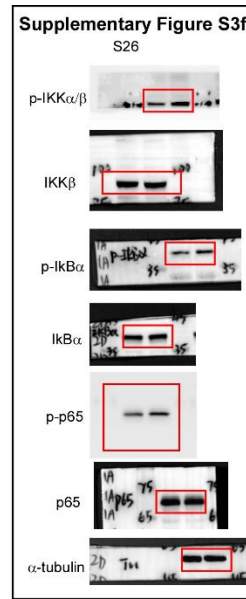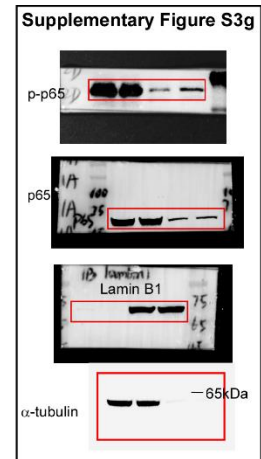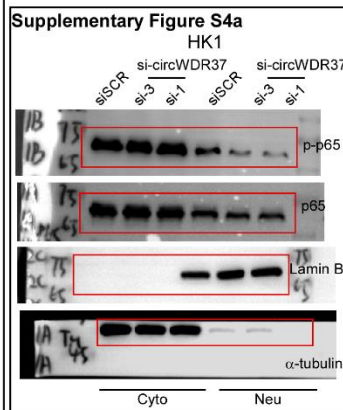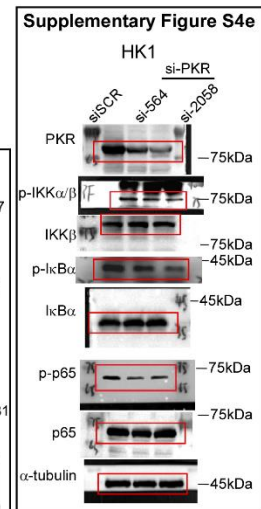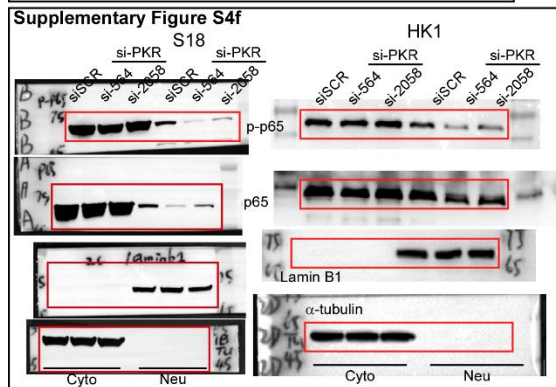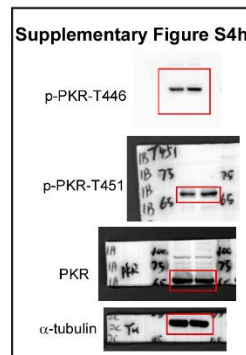

Supplementary figure S8. Full unedited gels for all figures (continued).

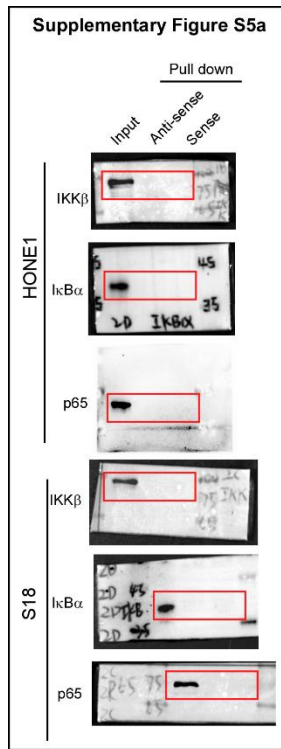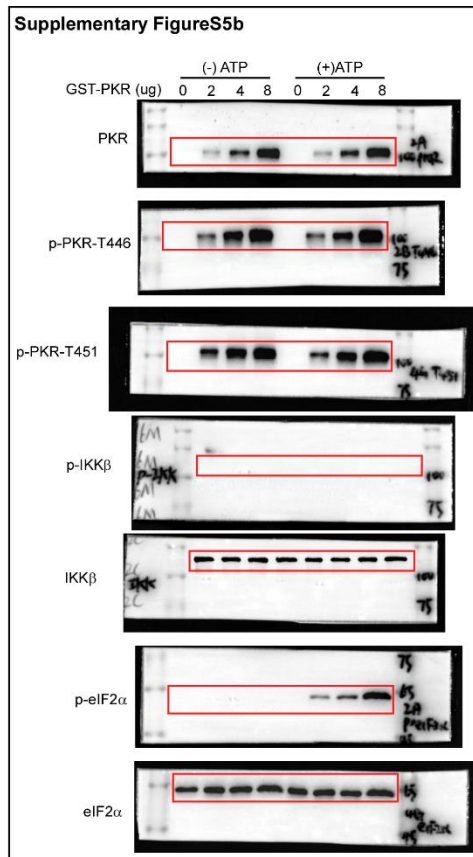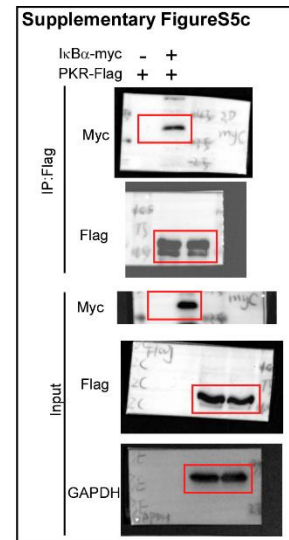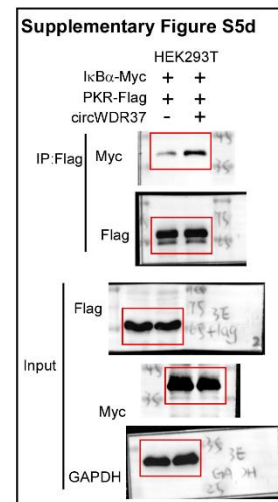

127  
128

**Supplementary Table S1. The CSCD database information of the 40 circRNAs validated via 4 different algorithms**

| <b>Num<br/>ber</b> | <b>AccID</b>                          | <b>circBase ID</b> | <b>ratio(circRNA<br/>/linear)</b> | <b>algorithm</b>                             |
|--------------------|---------------------------------------|--------------------|-----------------------------------|----------------------------------------------|
| 1                  | chr10_1142186_113<br>0343_+11843-     | hsa_circ_0000206   | 0.817483225                       | find_circ,CIRI,circR<br>NA_finder,circexplor |
| 2                  | chr5_38530768_385<br>23521_-7247-LIFR | hsa_circ_0072309   | 0.742648174                       | find_circ,CIRI,circR<br>NA_finder,circexplor |
| 3                  | chr17_81006661_81<br>006347_-314-     | hsa_circ_0000819   | 0.732376141                       | find_circ,CIRI,circR<br>NA_finder,circexplor |
| 4                  | chr8_131414216_13<br>1370263_-43953-  | hsa_circ_0003691   | 0.718631125                       | find_circ,CIRI,circR<br>NA_finder,circexplor |
| 5                  | chr3_196534785_19<br>6533450_+1335-   | hsa_circ_0003036   | 0.71154252                        | find_circ,CIRI,circR<br>NA_finder,circexplor |
| 6                  | chr11_122647918_1<br>22646927_+991-   | hsa_circ_0003391   | 0.704525435                       | find_circ,CIRI,circR<br>NA_finder,circexplor |
| 7                  | chr2_36669878_366<br>23757_+46121-    | hsa_circ_0002346   | 0.695870364                       | find_circ,CIRI,circR<br>NA_finder,circexplor |
| 8                  | chr9_134526336_13<br>4518626_-7710-   | hsa_circ_0089254   | 0.684453123                       | find_circ,CIRI,circR<br>NA_finder,circexplor |
| 9                  | chr12_111856681_1<br>11855923_+758-   | hsa_circ_0006741   | 0.680562502                       | find_circ,CIRI,circR<br>NA_finder,circexplor |
| 10                 | chr15_71447271_71<br>433788_+13483-   | hsa_circ_0005203   | 0.662019093                       | find_circ,CIRI,circR<br>NA_finder,circexplor |
| 11                 | chr1_167944253_16<br>7935867_+8386-   | hsa_circ_0009109   | 0.660022996                       | find_circ,CIRI,circR<br>NA_finder,circexplor |
| 12                 | chr7_100454798_10<br>0454490_+308-    | hsa_circ_0007639   | 0.654949866                       | find_circ,CIRI,circR<br>NA_finder,circexplor |
| 13                 | chr7_1938026_1937<br>836_-190-MAD1L1  | hsa_circ_0079135   | 0.644007367                       | find_circ,CIRI,circR<br>NA_finder,circexplor |
| 14                 | chr10_49618211_49<br>609655_+8556-    | hsa_circ_0002968   | 0.641119508                       | find_circ,CIRI,circR<br>NA_finder,circexplor |
| 15                 | chr4_89400658_893<br>96992_+3666-     | hsa_circ_0070421   | 0.640744622                       | find_circ,CIRI,circR<br>NA_finder,circexplor |
| 16                 | chr6_24418806_244<br>16625_+2181-     | hsa_circ_0075835   | 0.634776589                       | find_circ,CIRI,circR<br>NA_finder,circexplor |
| 17                 | chr19_46879831_46<br>878861_+970-     | hsa_circ_0003356   | 0.630428141                       | find_circ,CIRI,circR<br>NA_finder,circexplor |
| 18                 | chr1_46295253_462<br>90105_+5148-     | hsa_circ_0012277   | 0.629631836                       | find_circ,CIRI,circR<br>NA_finder,circexplor |
| 19                 | chr12_29911710_29<br>904599_-7111-    | hsa_circ_0025767   | 0.610061196                       | find_circ,CIRI,circR<br>NA_finder,circexplor |
| 20                 | chr20_60922084_60<br>920874_-1210-    | hsa_circ_0061099   | 0.596578291                       | find_circ,CIRI,circR<br>NA_finder,circexplor |

|    |                                       |                  |             |                                              |
|----|---------------------------------------|------------------|-------------|----------------------------------------------|
| 21 | chr11_103158334_1<br>03151077_+7257-  | hsa_circ_0006960 | 0.593295168 | find_circ,CIRI,circR<br>NA_finder,circexplor |
| 22 | chr1_98165103_981<br>44651_-20452-    | hsa_circ_0004161 | 0.577576234 | find_circ,CIRI,circR<br>NA_finder,circexplor |
| 23 | chr13_114277601_1<br>14265311_+12290- | hsa_circ_0031038 | 0.57559983  | find_circ,CIRI,circR<br>NA_finder,circexplor |
| 24 | chr11_981299_9770<br>95_+4204-AP2A2   | hsa_circ_0020740 | 0.571244543 | find_circ,CIRI,circR<br>NA_finder,circexplor |
| 25 | chr9_135527879_13<br>5517391_-10488-  | hsa_circ_0089294 | 0.557402854 | find_circ,CIRI,circR<br>NA_finder,circexplor |
| 26 | chr2_36623930_366<br>23757_+173-      | hsa_circ_0002017 | 0.556874631 | find_circ,CIRI,circR<br>NA_finder,circexplor |
| 27 | chr3_30691952_306<br>86239_+5713-     | hsa_circ_0005224 | 0.539544825 | find_circ,CIRI,circR<br>NA_finder,circexplor |
| 28 | chr6_144860579_14<br>4858718_+1861-   | hsa_circ_0001647 | 0.538974393 | find_circ,CIRI,circR<br>NA_finder,circexplor |
| 29 | chr17_16981390_16<br>979024_+2366-    | hsa_circ_0006600 | 0.526594271 | find_circ,CIRI,circR<br>NA_finder,circexplor |
| 30 | chr8_26441499_264<br>39485_+2014-     | hsa_circ_0005013 | 0.525701195 | find_circ,CIRI,circR<br>NA_finder,circexplor |
| 31 | chr10_128860040_1<br>28850945_+9095-  | hsa_circ_0020460 | 0.520198432 | find_circ,CIRI,circR<br>NA_finder,circexplor |
| 32 | chr5_14336836_142<br>70934_+65902-    | hsa_circ_0006674 | 0.509454593 | find_circ,CIRI,circR<br>NA_finder,circexplor |
| 33 | chr6_34574681_345<br>74332_-349-      | hsa_circ_0006757 | 0.509001025 | find_circ,CIRI,circR<br>NA_finder,circexplor |
| 34 | chr8_17143936_171<br>37884_+6052-     | hsa_circ_0083423 | 0.508163027 | find_circ,CIRI,circR<br>NA_finder,circexplor |
| 35 | chr12_56194684_56<br>182859_-11825-   | hsa_circ_0007446 | 0.503978299 | find_circ,CIRI,circR<br>NA_finder,circexplor |
| 36 | chr1_243388623_24<br>3385026_-3597-   | hsa_circ_0005749 | 0.497161563 | find_circ,CIRI,circR<br>NA_finder,circexplor |
| 37 | chr19_41737203_41<br>736872_+331-AXL  | hsa_circ_0002945 | 0.492995055 | find_circ,CIRI,circR<br>NA_finder,circexplor |
| 38 | chr3_186505373_18<br>6504916_+457-    | hsa_circ_0068464 | 0.470678199 | find_circ,CIRI,circR<br>NA_finder,circexplor |
| 39 | chr11_9446809_944<br>1958_+4851-IPO7  | hsa_circ_0004672 | 0.413797212 | find_circ,CIRI,circR<br>NA_finder,circexplor |
| 40 | chr20_34246904_34<br>243124_-3780-    | hsa_circ_0060122 | 0           | find_circ,CIRI,circR<br>NA_finder,circexplor |

## Supplementary Table S2. circWDR37-associated proteins or isoforms identified by mass spectrometry in NPC cells S18

| Nu | Accession     | Description                                                    | Sc | Ma | Ma | Matc | Sequ | Seque | Co  | pi | em  |
|----|---------------|----------------------------------------------------------------|----|----|----|------|------|-------|-----|----|-----|
| 1  | sp Q9Y6M1 IF  | Insulin-like growth factor 2 mRNA-binding protein 2 OS=Homo    | 11 | 66 | 2  | 2    | 2    | 2     | 4.2 | 8. | 0.1 |
| 2  | sp P09914 IFI | Interferon-induced protein with tetratricopeptide repeats 1    | 10 | 55 | 7  | 7    | 4    | 4     | 8.4 | 6. | 0.4 |
| 3  | sp Q16629 SR  | Serine/arginine-rich splicing factor 7 OS=Homo sapiens         | 10 | 27 | 3  | 3    | 2    | 2     | 8.8 | 11 | 0.2 |
| 4  | sp P31942 HN  | Heterogeneous nuclear ribonucleoprotein H3 OS=Homo sapiens     | 97 | 36 | 2  | 2    | 2    | 2     | 6.4 | 6. | 0.1 |
| 5  | sp Q7Z2W4 Z   | Zinc finger CCCH-type antiviral protein 1 OS=Homo sapiens      | 88 | 10 | 4  | 4    | 4    | 4     | 5.9 | 8. | 0.1 |
| 6  | sp P52209 PG  | 6-phosphogluconate dehydrogenase, decarboxylating OS=Homo      | 71 | 53 | 1  | 1    | 1    | 1     | 2.3 | 6. | 0.0 |
| 7  | sp Q07955 SR  | Serine/arginine-rich splicing factor 1 OS=Homo sapiens         | 70 | 27 | 3  | 3    | 2    | 2     | 8.5 | 10 | 0.2 |
| 8  | sp O75390 CIS | Citrate synthase, mitochondrial OS=Homo sapiens OX=9606        | 68 | 51 | 1  | 1    | 1    | 1     | 2.4 | 8. | 0.0 |
| 9  | sp P19525 E2A | Interferon-induced, double-stranded RNA-activated protein      | 65 | 62 | 3  | 3    | 2    | 2     | 4.9 | 8. | 0.1 |
| 10 | sp P09913 IFI | Interferon-induced protein with tetratricopeptide repeats 2    | 64 | 55 | 5  | 5    | 5    | 5     | 8.9 | 6. | 0.3 |
| 11 | sp O00425 IF2 | Insulin-like growth factor 2 mRNA-binding protein 3 OS=Homo    | 61 | 64 | 1  | 1    | 1    | 1     | 2.2 | 8. | 0.0 |
| 12 | sp Q8NBJ5 G   | Procollagen galactosyltransferase 1 OS=Homo sapiens OX=9606    | 60 | 71 | 1  | 1    | 1    | 1     | 2.3 | 6. | 0.0 |
| 13 | sp O95573 AC  | Long-chain-fatty-acid--CoA ligase 3 OS=Homo sapiens OX=9606    | 57 | 81 | 1  | 1    | 1    | 1     | 2.1 | 8. | 0.0 |
| 14 | sp O75569 PR  | Interferon-inducible double-stranded RNA-dependent protein     | 56 | 34 | 1  | 1    | 1    | 1     | 4.8 | 8. | 0.1 |
| 15 | sp Q7Z417 NU  | Nuclear fragile X mental retardation-interacting protein 2     | 55 | 76 | 1  | 1    | 1    | 1     | 1.9 | 8. | 0.0 |
| 16 | sp Q9NZ18 IF  | Insulin-like growth factor 2 mRNA-binding protein 1 OS=Homo    | 54 | 63 | 2  | 2    | 2    | 2     | 4.3 | 9. | 0.1 |
| 17 | sp Q08211 DH  | ATP-dependent RNA helicase A OS=Homo sapiens OX=9606           | 52 | 14 | 2  | 2    | 2    | 2     | 1.7 | 6. | 0.0 |
| 18 | sp P38159 RB  | RNA-binding motif protein, X chromosome OS=Homo sapiens        | 52 | 42 | 3  | 3    | 2    | 2     | 5.1 | 10 | 0.1 |
| 19 | sp P61221 AB  | ATP-binding cassette sub-family E member 1 OS=Homo sapiens     | 51 | 68 | 1  | 1    | 1    | 1     | 2   | 8. | 0.0 |
| 20 | sp P40938 RF  | Replication factor C subunit 3 OS=Homo sapiens OX=9606         | 50 | 41 | 1  | 1    | 1    | 1     | 3.9 | 8. | 0.0 |
| 21 | sp Q8TD47 RS  | 40S ribosomal protein S4, Y isoform 2 OS=Homo sapiens          | 49 | 29 | 2  | 2    | 1    | 1     | 3.4 | 10 | 0.1 |
| 22 | sp Q53EU6 G   | Glycerol-3-phosphate acyltransferase 3 OS=Homo sapiens         | 48 | 49 | 1  | 1    | 1    | 1     | 2.8 | 9. | 0.0 |
| 23 | sp Q9Y3Y2 C   | Chromatin target of PRMT1 protein OS=Homo sapiens              | 47 | 26 | 1  | 1    | 1    | 1     | 5.2 | 12 | 0.1 |
| 24 | sp O14879 IFI | Interferon-induced protein with tetratricopeptide repeats 3    | 47 | 56 | 2  | 2    | 2    | 2     | 3.1 | 5. | 0.1 |
| 25 | sp P62841 RS1 | 40S ribosomal protein S15 OS=Homo sapiens OX=9606              | 47 | 17 | 2  | 2    | 1    | 1     | 8.3 | 10 | 0.4 |
| 26 | sp P56589 PE  | Peroxisomal biogenesis factor 3 OS=Homo sapiens OX=9606        | 46 | 42 | 1  | 1    | 1    | 1     | 2.7 | 8. | 0.0 |
| 27 | sp Q12849 GR  | G-rich sequence factor 1 OS=Homo sapiens OX=9606               | 45 | 53 | 1  | 1    | 1    | 1     | 2.3 | 5. | 0.0 |
| 28 | sp Q15637 SF0 | Splicing factor 1 OS=Homo sapiens OX=9606 GN=SF1 PE=1          | 44 | 68 | 1  | 1    | 1    | 1     | 2   | 9. | 0.0 |
| 29 | sp Q99729 RO  | Heterogeneous nuclear ribonucleoprotein A/B OS=Homo sapiens    | 44 | 36 | 2  | 2    | 2    | 2     | 6.9 | 8. | 0.1 |
| 30 | sp Q96EP5 DA  | DAZ-associated protein 1 OS=Homo sapiens OX=9606               | 44 | 43 | 1  | 1    | 1    | 1     | 3.7 | 8. | 0.0 |
| 31 | sp P39748 FE  | Flap endonuclease 1 OS=Homo sapiens OX=9606 GN=FEN1            | 44 | 42 | 2  | 2    | 2    | 2     | 7.1 | 8. | 0.1 |
| 32 | sp Q3ZCQ8 TI  | Mitochondrial import inner membrane translocase subunit        | 41 | 39 | 1  | 1    | 1    | 1     | 4.8 | 8. | 0.0 |
| 33 | sp Q9BSR8 YI  | Protein YIPF4 OS=Homo sapiens OX=9606 GN=YIPF4 PE=1            | 40 | 27 | 1  | 1    | 1    | 1     | 3.7 | 4. | 0.1 |
| 34 | sp Q15149 PL  | Plectin OS=Homo sapiens OX=9606 GN=PLEC PE=1 SV=3              | 39 | 53 | 1  | 1    | 1    | 1     | 0.4 | 5. | 0.0 |
| 35 | sp Q5BKZ1 Z   | DBIRD complex subunit ZNF326 OS=Homo sapiens OX=9606           | 39 | 65 | 1  | 1    | 1    | 1     | 2.2 | 5. | 0.0 |
| 36 | sp Q9NXS2 Q   | Glutaminyl-peptide cyclotransferase-like protein OS=Homo       | 38 | 43 | 1  | 1    | 1    | 1     | 2.9 | 9. | 0.0 |
| 37 | sp Q13409 DC  | Cytoplasmic dynein 1 intermediate chain 2 OS=Homo sapiens      | 38 | 71 | 1  | 1    | 1    | 1     | 3.3 | 5. | 0.0 |
| 38 | sp Q5JWF2 G   | Guanine nucleotide-binding protein G(s) subunit alpha isoforms | 38 | 11 | 1  | 1    | 1    | 1     | 1.5 | 4. | 0.0 |
| 39 | sp O43818 U3I | U3 small nucleolar RNA-interacting protein 2 OS=Homo sapiens   | 36 | 52 | 1  | 1    | 1    | 1     | 2.1 | 7. | 0.0 |
| 40 | sp Q96AE4 FU  | Far upstream element-binding protein 1 OS=Homo sapiens         | 36 | 67 | 2  | 2    | 2    | 2     | 3.6 | 7. | 0.1 |
| 41 | sp Q7LGA3 H   | Heparan sulfate 2-O-sulfotransferase 1 OS=Homo sapiens         | 35 | 42 | 1  | 1    | 1    | 1     | 4.8 | 8. | 0.0 |
| 42 | sp Q92945 FU  | Far upstream element-binding protein 2 OS=Homo sapiens         | 35 | 73 | 1  | 1    | 1    | 1     | 1.8 | 6. | 0.0 |
| 43 | sp Q13325 IFI | Interferon-induced protein with tetratricopeptide repeats 5    | 35 | 56 | 2  | 2    | 2    | 2     | 3.7 | 7  | 0.1 |
| 44 | sp P31040 SD  | Succinate dehydrogenase [ubiquinone] flavoprotein subunit,     | 34 | 73 | 1  | 1    | 1    | 1     | 1.7 | 7. | 0.0 |
| 45 | sp Q9BU23 L   | Lipase maturation factor 2 OS=Homo sapiens OX=9606             | 34 | 79 | 1  | 1    | 1    | 1     | 3   | 10 | 0.0 |
| 46 | sp Q9Y310 RT  | RNA-splicing ligase RtcB homolog OS=Homo sapiens OX=9606       | 34 | 55 | 1  | 1    | 1    | 1     | 2.2 | 6. | 0.0 |
| 47 | sp Q15633 TR  | RISC-loading complex subunit TARBP2 OS=Homo sapiens            | 34 | 39 | 1  | 1    | 1    | 1     | 4.1 | 6. | 0.0 |
| 48 | sp Q9H7F4 T1  | Transmembrane protein 185B OS=Homo sapiens OX=9606             | 33 | 40 | 1  | 1    | 1    | 1     | 2.6 | 7. | 0.0 |
| 49 | sp O43291 SPI | Kunitz-type protease inhibitor 2 OS=Homo sapiens OX=9606       | 33 | 28 | 1  | 1    | 1    | 1     | 4.8 | 8. | 0.1 |
| 50 | sp O96006 ZB  | Zinc finger BED domain-containing protein 1 OS=Homo sapiens    | 31 | 78 | 1  | 1    | 1    | 1     | 1   | 5. | 0.0 |
| 51 | sp Q13347 EIF | Eukaryotic translation initiation factor 3 subunit 1 OS=Homo   | 31 | 36 | 1  | 1    | 1    | 1     | 3.7 | 5. | 0.0 |
| 52 | sp P37108 SRP | Signal recognition particle 14 kDa protein OS=Homo sapiens     | 30 | 14 | 1  | 1    | 1    | 1     | 21. | 10 | 0.2 |
| 53 | sp P61158 AR  | Actin-related protein 3 OS=Homo sapiens OX=9606 GN=ACTR3       | 30 | 47 | 1  | 1    | 1    | 1     | 3.3 | 5. | 0.0 |
| 54 | sp Q00688 FK  | Peptidyl-prolyl cis-trans isomerase FKBP3 OS=Homo sapiens      | 30 | 25 | 1  | 1    | 1    | 1     | 4.9 | 9. | 0.1 |
| 55 | sp P60468 SC6 | Protein transport protein Sec61 subunit beta OS=Homo sapiens   | 30 | 10 | 1  | 1    | 1    | 1     | 10. | 11 | 0.3 |
| 56 | sp Q07666 KH  | KH domain-containing, RNA-binding, signal transduction-        | 30 | 48 | 2  | 2    | 2    | 2     | 4.5 | 8. | 0.1 |
| 57 | sp Q81Y18 UL  | Serine/threonine-protein kinase ULK2 OS=Homo sapiens           | 30 | 11 | 1  | 1    | 1    | 1     | 0.8 | 8. | 0.0 |

|     |               |                                                              |    |    |   |   |   |   |     |    |     |
|-----|---------------|--------------------------------------------------------------|----|----|---|---|---|---|-----|----|-----|
| 58  | sp Q6UN15 FI  | Pre-mRNA 3'-end-processing factor FIP1 OS=Homo sapiens       | 30 | 66 | 1 | 1 | 1 | 1 | 2.4 | 5. | 0.0 |
| 59  | sp Q75NE6 MI  | Putative microRNA 17 host gene protein OS=Homo sapiens       | 30 | 83 | 2 | 2 | 1 | 1 | 17. | 9. | 0.4 |
| 60  | sp Q9NQ39 R   | Putative 40S ribosomal protein S10-like OS=Homo sapiens      | 30 | 20 | 1 | 1 | 1 | 1 | 3.4 | 10 | 0.1 |
| 61  | sp A0AV96 R   | RNA-binding protein 47 OS=Homo sapiens OX=9606               | 30 | 64 | 1 | 1 | 1 | 1 | 3.4 | 7. | 0.0 |
| 62  | sp Q8N684 CP  | Cleavage and polyadenylation specificity factor subunit 7    | 29 | 52 | 1 | 1 | 1 | 1 | 2.8 | 7. | 0.0 |
| 63  | sp Q9Y6Z5 AF  | Putative uncharacterized protein AFDN-DT OS=Homo sapiens     | 28 | 26 | 1 | 1 | 1 | 1 | 3.1 | 11 | 0.1 |
| 64  | sp Q99567 NU  | Nuclear pore complex protein Nup88 OS=Homo sapiens           | 28 | 84 | 1 | 1 | 1 | 1 | 1.8 | 5. | 0.0 |
| 65  | sp Q9H2H9 S3  | Sodium-coupled neutral amino acid transporter 1 OS=Homo      | 28 | 54 | 1 | 1 | 1 | 1 | 2.3 | 6. | 0.0 |
| 66  | sp Q9C0B5 Z   | Palmitoyltransferase ZDHHC5 OS=Homo sapiens OX=9606          | 28 | 78 | 1 | 1 | 1 | 1 | 2.2 | 9. | 0.0 |
| 67  | sp Q15427 SF3 | Splicing factor 3B subunit 4 OS=Homo sapiens OX=9606         | 27 | 44 | 1 | 1 | 1 | 1 | 3.3 | 8. | 0.0 |
| 68  | sp O60256 KP  | Phosphoribosyl pyrophosphate synthase-associated protein 2   | 27 | 41 | 1 | 1 | 1 | 1 | 2.4 | 7. | 0.0 |
| 69  | sp P05023 AT1 | Sodium/potassium-transporting ATPase subunit alpha-1         | 27 | 11 | 1 | 1 | 1 | 1 | 1.5 | 5. | 0.0 |
| 70  | sp Q86V85 GP  | Integral membrane protein GPR180 OS=Homo sapiens OX=9606     | 27 | 50 | 1 | 1 | 1 | 1 | 3.4 | 7. | 0.0 |
| 71  | sp Q9H4K7 M   | Mitochondrial ribosome-associated GTPase 2 OS=Homo sapiens   | 26 | 44 | 1 | 1 | 1 | 1 | 3.4 | 9. | 0.0 |
| 72  | sp O75396 SC  | Vesicle-trafficking protein SEC22b OS=Homo sapiens OX=9606   | 26 | 24 | 1 | 1 | 1 | 1 | 4.7 | 6. | 0.1 |
| 73  | sp Q9NUQ6 S   | SPATS2-like protein OS=Homo sapiens OX=9606 GN=SPATS2L       | 26 | 62 | 1 | 1 | 1 | 1 | 1.8 | 9. | 0.0 |
| 74  | sp Q96PE1 A   | Adhesion G protein-coupled receptor A2 OS=Homo sapiens       | 26 | 14 | 1 | 1 | 1 | 1 | 0.9 | 8. | 0.0 |
| 75  | sp Q13573 SN  | SNW domain-containing protein 1 OS=Homo sapiens OX=9606      | 26 | 61 | 1 | 1 | 1 | 1 | 2.8 | 9. | 0.0 |
| 76  | sp P49023 PA  | Paxillin OS=Homo sapiens OX=9606 GN=PXN PE=1 SV=3            | 26 | 65 | 1 | 1 | 1 | 1 | 2.9 | 5. | 0.0 |
| 77  | sp P46779 RL2 | 60S ribosomal protein L28 OS=Homo sapiens OX=9606            | 26 | 15 | 1 | 1 | 1 | 1 | 5.8 | 12 | 0.2 |
| 78  | sp Q9UKA9 P   | Polypyrimidine tract-binding protein 2 OS=Homo sapiens       | 25 | 57 | 1 | 1 | 1 | 1 | 1.1 | 8. | 0.0 |
| 79  | sp P61962 DC  | DDB1- and CUL4-associated factor 7 OS=Homo sapiens           | 25 | 39 | 1 | 1 | 1 | 1 | 3.2 | 5. | 0.0 |
| 80  | sp Q9BZE1 R   | 39S ribosomal protein L37, mitochondrial OS=Homo sapiens     | 24 | 48 | 1 | 1 | 1 | 1 | 3.8 | 8. | 0.0 |
| 81  | sp Q96000 ND  | NADH dehydrogenase [ubiquinone] 1 beta subcomplex subunit    | 24 | 21 | 1 | 1 | 1 | 1 | 6.4 | 8. | 0.1 |
| 82  | sp Q01844 EW  | RNA-binding protein EWS OS=Homo sapiens OX=9606              | 24 | 68 | 1 | 1 | 1 | 1 | 2.1 | 9. | 0.0 |
| 83  | sp Q6ZN19 Z   | Zinc finger protein 841 OS=Homo sapiens OX=9606              | 24 | 95 | 1 | 1 | 1 | 1 | 1   | 9. | 0.0 |
| 84  | sp P42694 HE  | Probable helicase with zinc finger domain OS=Homo sapiens    | 24 | 22 | 1 | 1 | 1 | 1 | 0.3 | 7. | 0.0 |
| 85  | sp P40222 TX  | Alpha-taxilin OS=Homo sapiens OX=9606 GN=TXLNA PE=1          | 24 | 62 | 1 | 1 | 1 | 1 | 5.1 | 6. | 0.0 |
| 86  | sp O94776 MT  | Metastasis-associated protein MTA2 OS=Homo sapiens OX=9606   | 24 | 75 | 1 | 1 | 1 | 1 | 2.4 | 9. | 0.0 |
| 87  | sp Q6PJG6 B   | BRCA1-associated ATM activator 1 OS=Homo sapiens OX=9606     | 24 | 89 | 1 | 1 | 1 | 1 | 1.3 | 5. | 0.0 |
| 88  | sp Q4G0X9 C   | Coiled-coil domain-containing protein 40 OS=Homo sapiens     | 24 | 13 | 1 | 1 | 1 | 1 | 1   | 5. | 0.0 |
| 89  | sp O60318 GA  | Germinal-center associated nuclear protein OS=Homo sapiens   | 24 | 22 | 1 | 1 | 1 | 1 | 1.1 | 5. | 0.0 |
| 90  | sp P04275 VW  | von Willebrand factor OS=Homo sapiens OX=9606 GN=VWF         | 23 | 32 | 1 | 1 | 1 | 1 | 0.3 | 5. | 0.0 |
| 91  | sp Q96JQ0 PC  | Protocadherin-16 OS=Homo sapiens OX=9606 GN=DCHS1            | 23 | 34 | 1 | 1 | 1 | 1 | 0.3 | 4. | 0.0 |
| 92  | sp Q96PB1 CA  | N-acetylneuraminase 9-O-acetyltransferase OS=Homo sapiens    | 23 | 92 | 1 | 1 | 1 | 1 | 1.8 | 9. | 0.0 |
| 93  | sp O15243 OB  | Leptin receptor gene-related protein OS=Homo sapiens OX=9606 | 22 | 14 | 1 | 1 | 1 | 1 | 9.9 | 6. | 0.2 |
| 94  | sp Q14192 FH  | Four and a half LIM domains protein 2 OS=Homo sapiens        | 20 | 34 | 1 | 1 | 1 | 1 | 4.3 | 7. | 0.1 |
| 95  | sp O60884 DN  | DnaJ homolog subfamily A member 2 OS=Homo sapiens            | 20 | 46 | 1 | 1 | 1 | 1 | 2.4 | 6. | 0.0 |
| 96  | sp Q86YR7 M   | Probable guanine nucleotide exchange factor MCF2L2           | 19 | 12 | 1 | 1 | 1 | 1 | 1.3 | 6  | 0.0 |
| 97  | sp Q9C0H6 K   | Kelch-like protein 4 OS=Homo sapiens OX=9606 GN=KLHL4        | 19 | 81 | 1 | 1 | 1 | 1 | 2.5 | 6. | 0.0 |
| 98  | sp Q6ZRUS Y   | Putative uncharacterized protein FLJ46089 OS=Homo sapiens    | 19 | 17 | 1 | 1 | 1 | 1 | 10. | 9. | 0.1 |
| 99  | sp Q8N9W4 G   | Golgin subfamily A member 6-like protein 2 OS=Homo sapiens   | 19 | 10 | 1 | 1 | 1 | 1 | 1   | 4. | 0.0 |
| 100 | sp Q86X53 ER  | Glutamate-rich protein 1 OS=Homo sapiens OX=9606             | 19 | 49 | 1 | 1 | 1 | 1 | 3.2 | 4. | 0.0 |
| 101 | sp Q9HC52 C   | Chromobox protein homolog 8 OS=Homo sapiens OX=9606          | 17 | 43 | 1 | 1 | 1 | 1 | 1.3 | 9. | 0.0 |
| 102 | sp P16070 CD  | CD44 antigen OS=Homo sapiens OX=9606 GN=CD44 PE=1            | 17 | 82 | 1 | 1 | 1 | 1 | 2.2 | 5. | 0.0 |
| 103 | sp Q96PM5 Z   | RING finger and CHY zinc finger domain-containing protein 1  | 17 | 31 | 1 | 1 | 1 | 1 | 4.6 | 6. | 0.1 |
| 104 | sp Q8NGJ1 O   | Olfactory receptor 4D6 OS=Homo sapiens OX=9606 GN=OR4D6      | 14 | 36 | 1 | 1 | 1 | 1 | 2.2 | 8. | 0.0 |



133 **Supplementary Table S3. Clinical characteristics of NPC patients according to**  
 134 **high and low circWDR37 expression**

| Characteristics                | No. of patients | Expression of circWDR37 |             | P value      |
|--------------------------------|-----------------|-------------------------|-------------|--------------|
|                                |                 | Low, n (%)              | High, n (%) |              |
| <b>Age</b>                     |                 |                         |             |              |
| < 45                           | 81              | 58 (57.4)               | 23 (60.0)   | 0.868        |
| ≥ 45                           | 59              | 43(42.6)                | 16 (41.0)   |              |
| <b>Sex</b>                     |                 |                         |             |              |
| Male                           | 24              | 20 (19.8)               | 4 (10.3)    | 0.179        |
| Female                         | 116             | 81 (80.2)               | 35(89.7)    |              |
| <b>pre-EBV</b>                 |                 |                         |             |              |
| < 2 (×1000)                    | 59              | 44 (43.6)               | 15 (38.5)   | 0.584        |
| ≥ 2 (×1000)                    | 81              | 57 (56.4)               | 24 (61.5)   |              |
| <b>T Stage</b>                 |                 |                         |             |              |
| T1-T2                          | 18              | 11 (10.9)               | 7 (17.9)    | 0.263        |
| T3-T4                          | 122             | 90 (89.1)               | 32 (82.1)   |              |
| <b>N Stage</b>                 |                 |                         |             |              |
| N0-N1                          | 71              | 56 (55.4)               | 15 (38.5)   | 0.072        |
| N2-N3                          | 69              | 45 (44.6)               | 24 (61.5)   |              |
| <b>Death</b>                   |                 |                         |             |              |
| No                             | 115             | 87 (86.1)               | 28 (71.8)   | <b>0.047</b> |
| Yes                            | 25              | 14(13.9)                | 11 (28.2)   |              |
| <b>Distant metastasis (DM)</b> |                 |                         |             |              |
| No                             | 114             | 87(86.1)                | 27 (69.2)   | <b>0.021</b> |
| Yes                            | 26              | 14(13.9)                | 12 (30.8)   |              |

135 Abbreviations: pre-EBV, pretreatment plasma Epstein-Barr virus DNA; OS: overall survival;  
 136 DFS, disease-free survival; P value was determined by  $\chi^2$  or Fisher's exact tests.  
 137

138 **Supplementary Table S4. Univariate and multivariable Cox regression analysis of**  
 139 **circWDR37 expression level and survival in NPC patients**

| Variable                                | Univariate analysis |              |                   | Multivariate analysis |              |                  |
|-----------------------------------------|---------------------|--------------|-------------------|-----------------------|--------------|------------------|
|                                         | HR                  | 95% CI       | P value           | HR                    | 95% CI       | P value          |
| <b>Overall survival</b>                 |                     |              |                   |                       |              |                  |
| CircWDR37 expression (high vs. low)     | 2.357               | 1.068-5.203  | <b>0.034</b>      | 2.531                 | 1.132-5.659  | <b>0.024</b>     |
| T stage (T3-T4 vs. T1-T2)               | 1.773               | 0.418-7.519  | 0.437             |                       |              |                  |
| N stage (N2-N3 vs. N0-N1)               | 3.651               | 1.513-8.807  | <b>0.004</b>      | 1.943                 | 1.243-3.039  | <b>0.004</b>     |
| Age ( $\geq 45$ vs. $< 45$ years)       | 2.791               | 1.232-6.320  | <b>0.014</b>      | 3.000                 | 1.317-6.834  | <b>0.009</b>     |
| Gender (Female vs. male)                | 1.193               | 0.409-3.479  | 0.746             |                       |              |                  |
| pre-EBV ( $\geq 2000$ vs. $< 2000$ )    | 9.376               | 2.210-39.786 | <b>0.002</b>      | 6.576                 | 1.524-28.373 | <b>0.012</b>     |
| <b>Disease-free survival</b>            |                     |              |                   |                       |              |                  |
| CircWDR37 expression (high vs. low)     | 3.018               | 1.582-5.760  | <b>0.001</b>      | 3.324                 | 1.723-6.413  | <b>&lt;0.001</b> |
| T stage (T3-T4 vs. T1-T2)               | 1.286               | 0.455-3.630  | 0.635             |                       |              |                  |
| N stage (N2-N3 vs. N0-N1)               | 3.763               | 1.813-7.811  | <b>&lt; 0.001</b> | 3.827                 | 1.784-8.208  | <b>0.001</b>     |
| Age ( $\geq 45$ vs. $< 45$ years)       | 1.785               | 0.935-3.408  | 0.079             |                       |              |                  |
| Gender (Female vs. male)                | 1.449               | 0.564-3.719  | 0.441             |                       |              |                  |
| pre-EBV ( $\geq 2000$ vs. $< 2000$ )    | 5.506               | 2.144-14.137 | <b>&lt; 0.001</b> | 4.208                 | 1.620-10.928 | <b>0.003</b>     |
| <b>Distant metastasis-free survival</b> |                     |              |                   |                       |              |                  |
| CircWDR37 expression (high vs. low)     | 2.615               | 1.208-5.659  | <b>0.015</b>      | 2.305                 | 1.062-4.999  | <b>0.035</b>     |
| T stage (T3-T4 vs. T1-T2)               | 0.814               | 0.281-2.364  | 0.706             |                       |              |                  |
| N stage (N2-N3 vs. N0-N1)               | 4.653               | 1.853-11.684 | <b>0.001</b>      | 3.520                 | 1.388-8.926  | <b>0.008</b>     |
| Age ( $\geq 45$ vs. $< 45$ years)       | 1.741               | 0.804-3.767  | 0.159             |                       |              |                  |
| Gender (Female vs. male)                | 1.787               | 0.536-5.955  | 0.344             |                       |              |                  |
| pre-EBV ( $\geq 2000$ vs. $< 2000$ )    | 4.489               | 1.546-13.034 | <b>0.006</b>      | 3.457                 | 1.177-10.150 | <b>0.024</b>     |

140 Abbreviations: pre-EBV, pre-treatment plasma Epstein-Barr virus DNA; HR, hazard ratio;  
 141 NS, not significant. Bold values indicate  $P < 0.05$ ,  $P$  value was determined by Cox regression  
 142 analysis.

143

**Supplementary Table S5. Primers and RNA sequences used in this study**

| <b>List of oligonucleotide sequences</b> | <b>5'→3' (F, forward; R, reverse.)</b> |
|------------------------------------------|----------------------------------------|
| <b>Primers for RT-qPCR</b>               |                                        |
| CircWDR37-F/Divergent                    | GGCTCTCACTGCTTCTGGAG                   |
| CircWDR37-R/Divergent                    | GCTCTCGATGTCGTGGTCTT                   |
| Convergent-circWDR37-F                   | ACCACGACATCGAGAGCTG                    |
| Convergent-circWDR37-R                   | TCTTGGCCACGCTGACATC                    |
| WDR37-F                                  | CCCACAGAAAGCGCAAGTTG                   |
| WDR37-R                                  | AACCGAGGAAGGCAGTTTAGA                  |
| GAPDH-F/Convergent                       | AACGGATTTGGTCGTATTGG                   |
| GAPDH-R/Convergent                       | TTGATTTTGGAGGGATCTCG                   |
| Divergent-GAPDH-F                        | CCAATACGACCAAATCCGTT                   |
| Divergent-GAPDH-R                        | CGAGATCCCTCCAAAATCAA                   |
| GAPDH-F                                  | GTCTCCTCTGACTTCAACAGCG                 |
| GAPDH-R                                  | ACCACCCTGTTGCTGTAGCCAA                 |
| β-actin-F                                | CACCATTGGCAATGAGCGGTTTC                |
| β-actin-R                                | AGGTCTTTGCGGATGTCCACGT                 |
| PKR-F                                    | GAAGTGGACCTCTACGCTTTGG                 |
| PKR-R                                    | TGATGCCATCCCGTAGGTCTGT                 |
| U6-F                                     | CTCGCTTCGGCAGCACAT                     |
| U6-R                                     | TTTGCGTGTGTCATCCTTGCG                  |
| <b>shRNAs</b>                            |                                        |
| sh-circWDR37-F                           | CTAGTATTGTCTCCAGCTT                    |
| sh-circWDR37-R                           | AAGCTGGAGACAATACTAG                    |
| <b>siRNAs</b>                            |                                        |
| si-circWDR37-1                           | GTTGCTGACACTAGTATTG                    |
| si-circWDR37-3                           | CTAGTATTGTCTCCAGCTT                    |
| si-PKR-564                               | GGUGAUCUUUCAGCAGGUUTT                  |
| si-PKR-2058                              | GGCAUCAUCUCAGAUUAUUTT                  |

**Supplementary Table S6. Antibodies used in this study**

| <b>Antibodies</b>            | <b>Source</b>             | <b>Identifier</b> |
|------------------------------|---------------------------|-------------------|
| Anti-IKK $\beta$             | Cell Signaling Technology | 2678T             |
| Anti-p-IKK $\alpha/\beta$    | Cell Signaling Technology | 2697T             |
| Anti-p65                     | Proteintech               | 10745-1-AP        |
| Anti-p-p65                   | Cell Signaling Technology | 3033T             |
| Anti-I $\kappa$ B $\alpha$   | Cell Signaling Technology | 4814T             |
| Anti-p-I $\kappa$ B $\alpha$ | Cell Signaling Technology | 2859T             |
| Anti-PKR                     | Proteintech               | 18244-1-AP        |
| Anti-p-PKR-T446              | Abcam                     | ab32036           |
| Anti-p-PKR-T451              | Abcam                     | ab81303           |
| Anti-GAPDH                   | Abcam                     | ab8245            |
| Anti- $\alpha$ -tubulin      | Proteintech               | 66031-1-Ig        |
| Anti-eIF2 $\alpha$           | Beyotime                  | AF6771            |
| Anti-p-eIF2 $\alpha$         | Beyotime                  | AF1237            |
| Anti-Flag                    | Sigma-Aldrich             | F1804             |
| Anti-HA                      | Proteintech               | 51064-2-AP        |
| Anti-myc                     | Proteintech               | 16286-1-AP        |
| Anti-p16 <sup>INK4A</sup>    | Proteintech               | 10883-1-AP        |
| Anti-Cyclin D1               | Proteintech               | 60186-1-Ig        |
